# Supplementary material for: Model-Based Investigations of Different Vector-Related Intervention Strategies to Eliminate Visceral Leishmaniasis on the Indian Subcontinent
Source: PLoS Negl Trop Dis. 2014 Apr 24;8(4):e2810. doi: 10.1371/journal.pntd.0002810 (PMC3998939; doi:10.1371/journal.pntd.0002810)
Supplement: Table S2 — Model variables – humans. (DOC) [file pntd.0002810.s003.doc]

Table S2 – Model variables – humans.

| *SH*, *SV* | Number of humans in the susceptible stage |
| --- | --- |
| *IHP*, *IVP* | Number of humans in the early asymptomatic infectious stage |
| *IHD*, *IVD* | Number of humans in the late asymptomatic infectious stage |
| *RHD*, *RVD* | Number of humans in the early recovery stage |
| *RHC*, *RVC* | Number of humans in the late recovery stage |
| *IHS*, *IVS* | Number of humans with symptomatic VL eligible for treatment |
| *IHT1*, *IVT1* | Number of humans under first-line VL treatment |
| *IHT2*, *IVT2* | Number of humans under second-line VL treatment |
| *RHT*, *RVT* | Number of humans that recovered after treatment |
| *RHL*, *RVL*, | Number of humans putatively recovered after VL treatment but will develop PKDL |
| *IHL*, *IVL* | Number of humans with PKDL |

For immuno-compromised humans, index *H* is replaced by index *V*.
